# Supplementary material
Source: Springer Nature journal article supplement (https://www.springermedizin.de/resource/supplementary/13584_2014_144_MOESM2_ESM.pdf/9677050)

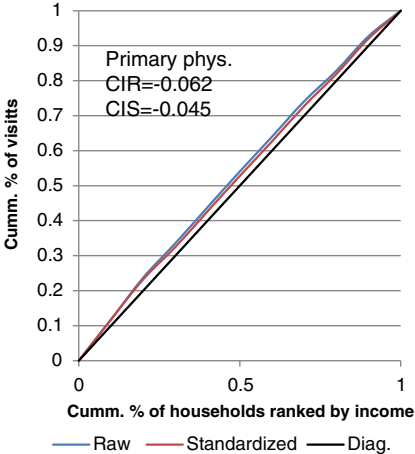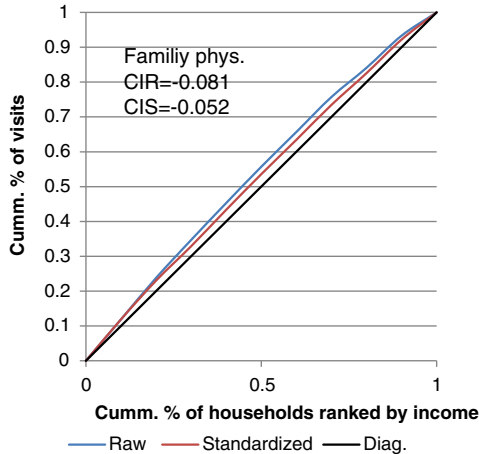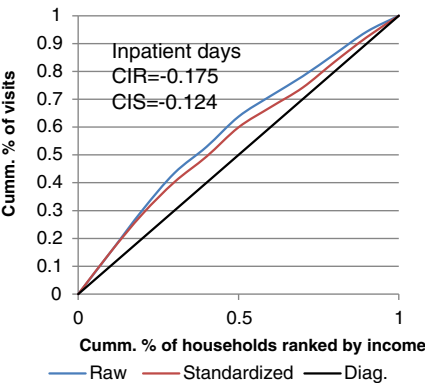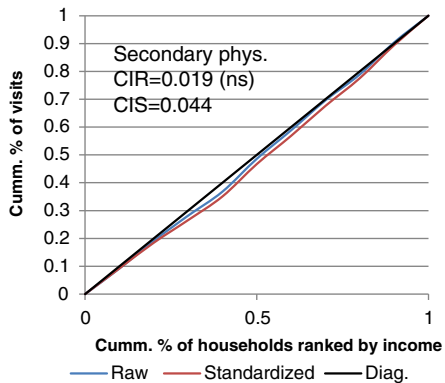

Supplement: MOESM2 [file 9677050]
